# Supplementary material
Source: PubMed Central journal article supplement (PMC2791575)
Supplement: 0910813106_0910813106SI.pdf [file 0910813106_0910813106SI.pdf]

# Supporting Information

## French and Heberlein 10.1073/pnas.0910813106

### SI Text

**Drosophila Strains.** The *Or83b-GAL4* strain was a kind gift of L. Vosshall (Rockefeller University, New York), *UAS-NRI<sup>RNAi-1</sup>* and *UAS-NRI<sup>RNAi-2</sup>* were generously provided by B. Dickson (Research Institute of Molecular Pathology, Vienna) and T. Tully (Watson School of Biological Sciences, Cold Spring Harbor, NY), respectively. *sgg<sup>E3</sup>* and *sgg<sup>E6</sup>* were provided by F. Wolf (Gallo Research Center, Emeryville, CA). *sgg<sup>EP1379</sup>* and *sgg<sup>EP1576</sup>* were obtained from the Szeged *Drosophila* Stock Center. All other strains were obtained from the Bloomington *Drosophila* Stock Center.

**Olfactory Startle.** We quantified the olfactory startle response as the maximum average velocity achieved by a group of 20 to 25 flies during a 1-min pulse of ethanol vapor (100:50 E/A ratio). Movement was analyzed in 10-s intervals (1, 2). Typically, flies achieved their greatest speed within 10 s of initial ethanol exposure. In most figures, experimental startle magnitude is presented as a fraction of the maximum velocity achieved by flies of the same genotype that had never been exposed to ethanol.

**Histology, Cell-Death Assays, and Microscopy.** For TUNEL assays, flies were exposed to ethanol for 1 h and processed 2 to 3 h after exposure. Fly heads were embedded and cut into 14- $\mu$ m sections. Sections were then processed using the Roche In Situ Cell Death Detection kit, TMR Red. GFP fluorescence was examined in whole-mount dissected antennae or in fixed cryosections. Images were collected on a Leica TCS SP2 confocal laser scanning microscope and final images were generated by overlaying a z-series of eight to 10 2- $\mu$ m sections.

**Western Blot Analysis.** Frozen antennae were homogenized in lysis buffer containing 13 parts 1 $\times$  PBT (1 $\times$  PBS plus 0.2% Tween-20), 5 parts 4 $\times$  NuPAGE LDS Sample Buffer (Invitrogen), and 2 parts 0.5 M DTT (DTT). Samples were denatured at 80  $^{\circ}$ C for 15 min, and then each lane was loaded with protein equivalent to 30 antennae. Electrophoresis and transfer were carried out under standard conditions. Antibodies used were: 1/500 anti-GSK3 kinase domain (clone 4G-1E, Upstate Biotechnology, Lake Placid, NY); 1/10000 anti- $\alpha$ -tubulin (DM1A, Novus Biologicals).

1. Wolf FW, Eddison M, Lee S, Cho W, Heberlein U (2007) GSK-3/Shaggy regulates olfactory habituation in *Drosophila*. *Proc Natl Acad Sci USA* 104:4653–4657.

2. Cho W, Heberlein U, Wolf FW (2004) Habituation of an odorant-induced startle response in *Drosophila*. *Genes Brain Behav* 3:127–137.

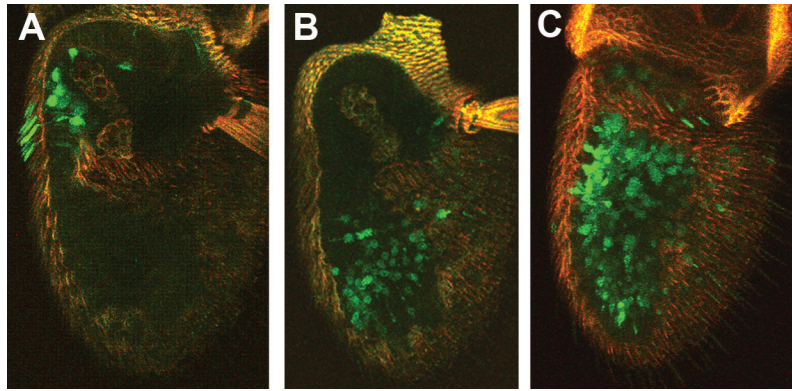

**Fig. S1.** Expression of olfactory receptors in sensillar subtypes. Confocal reconstructions of antennae from flies expressing *UAS-GFP* in olfactory neurons under the control of the *Or22-GAL4* (A), *Or67d-GAL4* (B) or *Or83b-GAL4* (C) drivers. *Or22a-GAL4* is expressed in basiconic sensilla, while *Or67d-GAL4* is expressed in trichoid sensilla [Couto A, Alenius M, Dickson BJ (2005) Molecular, anatomical, and functional organization of the *Drosophila* olfactory system. *Curr Biol* 15:1535–1547.]. Green, GFP; yellow/orange, autofluorescence.



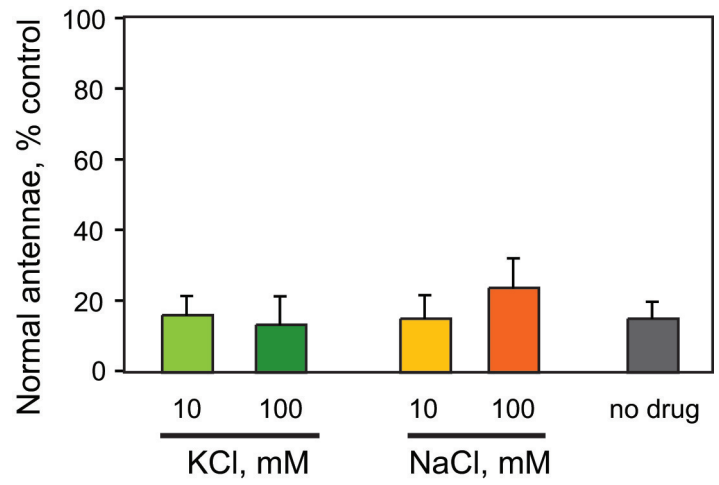

**Fig. S3.** Neither potassium chloride nor sodium chloride protects against olfactory damage. Flies fed 10-mM or 100 mM KCl- or NaCl-containing food for 5 days before ethanol exposure show no resistance to the damaging effects of ethanol on antennal morphology ( $n = 4$ ). Flies were exposed to ethanol on Day 5 of treatment, and assayed on Day 7.

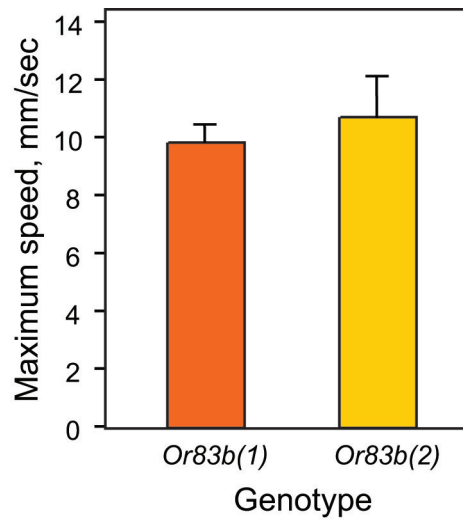

**Fig. S4.** *Or83b* null alleles have a normal ethanol startle. We tested two null alleles of *Or83b*: *Or83b(1)* and *Or83b(2)* [Larsson MC, et al. (2004) *Or83b* encodes a broadly expressed odorant receptor essential for *Drosophila* olfaction. *Neuron* 43:703–714.]. Both alleles show a normal olfactory startle in response to ethanol exposure ( $n = 4$ ) (compare with Fig. 1A).

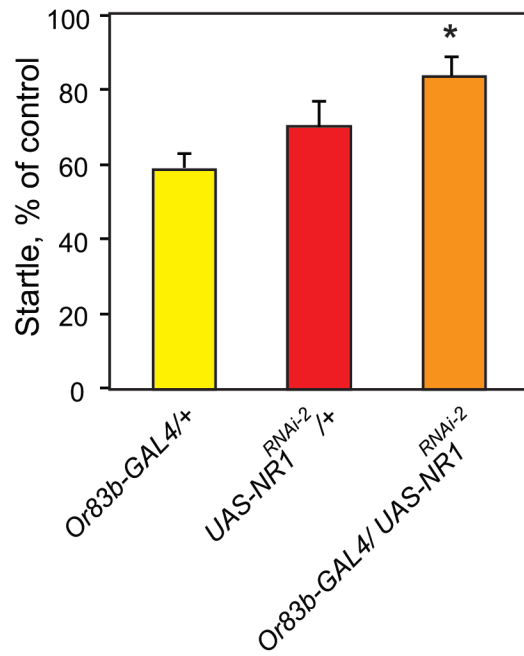

**Fig. S5.** Reducing NR1 in olfactory receptor neurons protects them from ethanol-induced olfactory damage. A second NR1 RNAi line shows protection of the ethanol startle when expressed in the ORNs. We tested an independently isolated NR1 RNAi line (*UAS-NR1<sup>RNAi-2</sup>*) and found that, when expressed under the control of *Or83b-GAL4*, this line also leads to protection of the olfactory startle ( $n = 5$ , \*,  $P < 0.05$ ).

**Table S1. Ethanol-induced ORN death is not cell-autonomous**

|                   | <i>UAS-p35</i> |                   | Control (no <i>UAS-p35</i> ) |                   |
|-------------------|----------------|-------------------|------------------------------|-------------------|
|                   | Surviving ORNs | No surviving ORNs | Surviving ORNs               | No surviving ORNs |
| <i>Or67d-GAL4</i> | 47% (8/17)     | 53% (9/17)        | 50% (8/16)                   | 50% (8/16)        |
| <i>Or22a-GAL4</i> | 71% (12/17)    | 29% (5/17)        | 56% (10/18)                  | 44% (8/18)        |
| <i>Or83b-GAL4</i> | 82% (14/17)    | 18% (3/17)        | 47% (9/19)                   | 53% (10/19)       |

Cell death in antennae expressing *UAS-p35* under the control of *Or22a-GAL4*, *Or67d-GAL4*, or *Or83b-GAL4*. Expression of p35 in a small group of cells is insufficient to protect against ethanol-induced cell death, indicating that the process is not cell-autonomous. The degree of cell death is correlated with more restricted p35 expression, with *Or83b-GAL4/UAS-p35* having the strongest protective effect and *Or67d/UAS-p35* having the weakest.
